# Supplementary material for: Prognostic significance and tumor-immune infiltration of mTOR in clear cell renal cell carcinoma
Source: PeerJ. 2021 Aug 17;9:e11901. doi: 10.7717/peerj.11901 (PMC8378334; doi:10.7717/peerj.11901)
Supplement: Supplemental Information 7 [file peerj-09-11901-s007.xlsx]

## Sheet: Sheet1
Sex	Age	Grade	Tumor size(cm)	T (stage)	Metastasis	Sex(1:male,2:femal)	Age(1:<60;2: ≥60)	Grade(1:Ⅰ,2:Ⅱ,3:Ⅲ-Ⅳ)	Tumor size(1:<7;2: ≥7)	Stage(1:Ⅰ,2:Ⅱ,3:Ⅲ-Ⅳ )	Metastasis(1:no;2:yes)	pmTOR(H:1;L:2)	mTOR(H:1;L:2)	Follow-up(1:alive;2:D)	Follow-up(1:d;2:a)	Follow up(months)
Male	58	Ⅰ	3.5×3.3×2.8cm	T1a		1	1	1	1	1	1	1	1	1	2	66
Male	58	Ⅰ	3.7x3.5x3.2	T1a		1	1	1	1	1	1	1	2	1	2	43
Male	58	Ⅰ	3.8x3.6x3.5cm	T1a		1	1	1	1	1	1	1	1	1	2	65
Male	58	Ⅰ	5.3×4.2×4.1cm	T1b		1	1	1	1	1	1	2	2	1	2	43
Male	46	Ⅰ	5.7×4.5×4.3cm	T1b		1	1	1	1	1	1	1	2	1	2	65
Male	56	Ⅱ	3.5×3.5×2.5cm	T1a		1	1	2	1	1	1	1	2	1	2	47
Male	45	Ⅱ	5.2×5.1×4.8cm	T1b		1	1	2	1	1	1	2	1	1	2	56
Male	57	Ⅱ	6.5×6.3×4.3cm	T1b		1	1	2	1	1	1	1	1	1	2	30
Male	54	Ⅱ	6×6×3cm	T1b		1	1	2	1	1	1	1	1	1	2	71
Male	46	Ⅱ	9.8x9.2x8.7cm	T2		1	1	2	2	2	1	1	1	1	2	60
Male	57	Ⅱ	9.5×9×8.5cm	T2		1	1	2	2	2	1	1	1	2	1	46
Male	45	Ⅳ	3.8×3.5×3.3cm	T1a		1	1	3	1	1	1	2	1	1	2	64
Male	50	Ⅲ	5.8×5.5×4.8cm	T1b		1	1	3	1	1	1	1	1	1	2	45
Male	52	Ⅲ	4.5×4.2×4cm	T1b		1	1	3	1	1	1	1	2	1	2	56
Male	46	Ⅲ	9.3×7.7×6.5cm	T3	Y	1	1	3	2	3	2	2	1	2	1	29
Male	58	Ⅲ	9.1x7.8x6.9	T4		1	1	3	2	3	1	2	2	2	1	23
Male	66	Ⅰ	3.8x3.8x3.6	T1a		1	2	1	1	1	1	1	1	1	2	47
Male	65	Ⅰ	4.5×4×4cm	T1b		1	2	1	1	1	1	2	2	1	2	62
Male	66	Ⅰ	4.8×4.5×4.4cm	T1b		1	2	1	1	1	1	1	2	1	2	57
Male	65	Ⅰ	7.6x6.5x4.7cm	T2		1	2	1	2	2	1	2	1	1	2	47
Male	71	Ⅱ	5.9×4.7×3.5cm	T1b	Y	1	2	2	1	1	2	1	2	1	2	41
Male	63	Ⅱ	3.5×3.2×3cm	T1a		1	2	2	1	1	1	1	1	1	2	49
Male	62	Ⅱ	3.8×3.4×3.2cm	T1a		1	2	2	1	1	1	2	1	1	2	63
Male	60	Ⅱ	3.8x3.7x3.5cm	T1a		1	2	2	1	1	1	1	1	1	2	57
Male	64	Ⅱ	5.8×5.1×4.8cm	T1b		1	2	2	1	1	1	1	1	1	2	49
Male	64	Ⅱ	6.5×6.0×5.3cm	T1b		1	2	2	1	1	1	2	2	1	2	39
Male	70	Ⅱ	6.7×5.6×4.3cm	T1b		1	2	2	1	1	1	1	2	1	2	41
Male	67	Ⅱ	8.3×7.3×6.5cm	T2		1	2	2	2	2	1	1	2	1	2	35
Male	76	Ⅱ	8.3×7.4×6.5cm	T2		1	2	2	2	2	1	2	2	2	1	58
Male	61	Ⅱ	8.4x6.9x5.7cm	T2		1	2	2	2	2	1	1	2	1	2	55
Male	60	Ⅱ	8.5x7.5x7.3cm	T2		1	2	2	2	2	1	1	2	1	2	54
Male	65	Ⅱ	8.7×6.4×5.8cm	T2		1	2	2	2	2	1	2	2	1	2	36
Male	65	Ⅱ	9.8x9.5x8.9cm	T2		1	2	2	2	2	1	1	2	1	2	27
Male	69	Ⅱ	7.5×6.7×6.5cm	T2		1	2	2	2	2	1	1	2	2	1	66
Male	71	Ⅱ	6.5×6.4×5.9cm	T4	Y	1	2	2	1	3	2	2	1	2	1	30
Male	70	Ⅱ	11x9.6x8.9	T4	Y	1	2	2	2	3	2	2	2	2	1	44
Male	70	Ⅲ	3.8x3.6x5.5cm	T1a		1	2	3	1	1	1	1	2	1	2	45
Male	60	Ⅲ	5.9×5.3×4.8cm	T1b		1	2	3	1	1	1	1	1	1	2	27
Male	75	Ⅳ	9.6×8.7×6.5cm	T3	Y	1	2	3	2	3	2	2	1	2	1	55
Male	63	Ⅲ	11×9×8cm	T3		1	2	3	2	3	1	1	1	2	1	49
Male	75	Ⅳ	10×9.5×8.5cm	T4		1	2	3	2	3	1	2	1	2	1	31
Male	74	Ⅲ	9.8x7.6x6.7	T4		1	2	3	2	3	1	1	1	2	1	29
Male	51	Ⅰ	3.8×3.7×3.6cm	T1a		1	1	1	1	1	1	1	2	1	2	37
Male	59	Ⅰ	5.7×4.6×4.3cm	T1b		1	1	1	1	1	1	1	2	1	2	54
Male	56	Ⅱ	2.5×2.5×2.5cm	T1a		1	1	2	1	1	1	1	2	1	2	47
Male	59	Ⅱ	5.5×5.3×4.8cm	T1b		1	1	2	1	1	1	1	2	1	2	58
Male	57	Ⅱ	8.5x7.6x7.1cm	T2		1	1	2	2	2	1	2	2	1	2	59
Male	45	Ⅱ	9.5×8.6×8.5cm	T3		1	1	2	2	3	1	1	2	2	1	41
Male	61	Ⅰ	5.8x5.6x5.5	T1b		1	2	1	1	1	1	1	2	1	2	67
Male	64	Ⅱ	6.1×6×5.3cm	T1b		1	2	2	1	1	1	1	2	1	2	71
Male	66	Ⅱ	8.5×8.1×7.6cm	T2		1	2	2	2	2	1	1	2	1	2	38
Male	73	Ⅱ	6.7×6.3×5.5cm	T3		1	2	2	1	3	1	2	2	2	1	56
Female	47	Ⅰ	6.8×6.5×5cm	T1b		2	1	1	1	1	1	1	1	1	2	26
Female	45	Ⅱ	6.7×6.5×5cm	T1b		2	1	2	1	1	1	1	1	1	2	25
Female	50	Ⅲ	3.5x3.2x2.5cm	T1a		2	1	3	1	1	1	1	1	1	2	48
Female	58	Ⅳ	6.5×6.5×6.3cm	T1b		2	1	3	1	1	1	2	1	2	1	54
Female	50	Ⅲ	8.8x8.3x8.1cm	T2	Y	2	1	3	2	2	2	1	2	2	1	44
Female	51	Ⅲ	7.5×5.5×5cm	T4		2	1	3	2	3	1	2	1	2	1	31
Female	67	Ⅰ	8.9x8.7x7.8cm	T2		2	2	1	2	2	1	1	1	1	2	67
Female	61	Ⅰ	6.5×6.3×5.5cm	T4	Y	2	2	1	1	3	2	2	1	2	1	33
Female	63	Ⅱ	9.6×8.4×7.8cm	T2		2	2	2	2	2	1	1	2	2	1	65
Female	67	Ⅳ	3.9×3.1×3cm	T1a		2	2	3	1	1	1	1	1	1	2	68
Female	69	Ⅳ	6.5×6.1×5.3cm	T1b		2	2	3	1	1	1	1	1	2	1	70
Female	64	Ⅳ	6.5×6.4×5.4cm	T3		2	2	3	1	3	1	1	1	2	1	44
Female	47	Ⅱ	3.7×3.6×3.2cm	T1a		2	1	2	1	1	1	2	2	2	1	46
Female	46	Ⅱ	8.6×8.4×7.3cm	T2		2	1	2	2	2	1	1	2	1	2	48
Female	53	Ⅲ	4.5x4.3x3.2	T4		2	1	3	1	3	1	1	2	2	1	36
Female	71	Ⅰ	8.5×7.4×5.9cm	T2		2	2	1	2	2	1	1	2	1	2	56
Female	72	Ⅱ	8.5×8.4×7.4cm	T2		2	2	2	2	2	1	1	2	2	1	71
Male	47	Ⅳ	5.5×5×4cm	T1b		1	1	3	1	1	1	1	1	1	2	49
Male	50	Ⅲ	8.5x6.5x4.7cm	T2		1	1	3	2	2	1	1	1	2	1	76
Male	57	Ⅲ	9x8.6x8.5cm	T2		1	1	3	2	2	1	2	1	2	1	57
Male	53	Ⅲ	9.5×8.7×5.5cm	T3		1	1	3	2	3	1	2	1	2	1	61
Male	60	Ⅳ	5.5×5.4×4.2cm	T1b		1	2	3	1	1	1	1	1	2	1	56
Male	62	Ⅲ	8.9x6.8x5.3cm	T2		1	2	3	2	2	1	2	1	2	1	56
Male	65	Ⅲ	15×9.8×9cm	T4	Y	1	2	3	2	3	2	2	2	2	1	27
Male	60	Ⅳ	10×9×8cm	T3		1	2	3	2	3	1	1	1	2	1	38
Male	61	Ⅳ	12.2×10.2×9.5cm	T3		1	2	3	2	3	1	2	1	2	1	31
Male	58	Ⅰ	10.1x9.5x9.1cm	T2		1	1	1	2	2	1	1	2	2	1	59
Male	57	Ⅰ	10.5×9.9×9.8cm	T2		1	1	1	2	2	1	2	1	2	1	71
Male	58	Ⅰ	8.6x6.5x5.3cm	T2		1	1	1	2	2	1	1	2	1	2	56
Male	53	Ⅰ	9.5×8.7×7.6cm	T2		1	1	1	2	2	1	2	1	1	2	51
Male	46	Ⅰ	6.5×6.5×5.5cm	T3		1	1	1	1	3	1	2	2	2	1	56
Male	58	Ⅰ	9×8×5.5cm	T3		1	1	1	2	3	1	2	2	2	1	65
Male	53	Ⅱ	8.6x6.5x5.7cm	T2		1	1	2	2	2	1	2	1	2	1	55
Male	59	Ⅱ	9.1x8.8x7.1cm	T2		1	1	2	2	2	1	2	1	2	1	56
Male	56	Ⅱ	9.4x9.4x7.9cm	T2		1	1	2	2	2	1	2	1	2	1	61
Male	58	Ⅱ	6.5x6.1x5.6cm	T3		1	1	2	1	3	1	2	2	2	1	47
Male	56	Ⅱ	6.8×6.4×3.5cm	T3		1	1	2	1	3	1	1	1	2	1	59
Male	57	Ⅱ	8.5×6.5×5cm	T4	Y	1	1	2	2	3	2	2	1	2	1	45
Male	52	Ⅱ	10.9x9.3x8.2	T4		1	1	2	2	3	1	2	1	2	1	26
Male	59	Ⅱ	10×9.5×8.7cm	T3		1	1	2	2	3	1	2	1	2	1	56
Male	59	Ⅱ	9.4×9.3×8.5cm	T3		1	1	2	2	3	1	2	1	2	1	38
Male	58	Ⅲ	5.8×5.6×5.3cm	T1b		1	1	3	1	1	1	1	1	2	1	57
Male	56	Ⅲ	8.7×8.6×7.6cm	T2		1	1	3	2	2	1	2	2	2	1	66
Male	45	Ⅲ	8.8x7.5x4.7cm	T2		1	1	3	2	2	1	1	2	2	1	73
Male	50	Ⅲ	6.9×6.6×6.5cm	T3		1	1	3	1	3	1	1	2	2	1	60
Male	59	Ⅳ	12x10.6x8.9	T4	Y	1	1	3	2	3	2	2	2	2	1	29
Male	45	Ⅲ	13×12.8×12.5cm	T3		1	1	3	2	3	1	2	2	2	1	31
Male	50	Ⅲ	8.3×6.4×6.3cm	T3		1	1	3	2	3	1	1	2	2	1	57
Male	60	Ⅰ	8.1x8x7.6cm	T2		1	2	1	2	2	1	1	2	1	2	49
Male	63	Ⅰ	9.7x9.4x8.7cm	T2		1	2	1	2	2	1	2	2	2	1	68
Male	65	Ⅰ	9.3x8.2x7.5cm	T4		1	2	1	2	3	1	2	1	2	1	67
Male	73	Ⅱ	9.2×8.5×5.5cm	T2		1	2	2	2	2	1	2	1	2	1	49
Male	71	Ⅱ	8.3×7.6×5.5cm	T2		1	2	2	2	2	1	1	1	2	1	70
Male	60	Ⅱ	6.3×5.8×5.5cm	T3		1	2	2	1	3	1	2	1	2	1	51
Male	64	Ⅱ	8.3×7.8×5.5cm	T3		1	2	2	2	3	1	2	1	2	1	27
Male	62	Ⅱ	8.3×7.8×5.5cm	T3		1	2	2	2	3	1	2	1	2	1	39
Male	60	Ⅱ	8.1×7.4×6.4cm	T4		1	2	2	2	3	1	2	2	2	1	47
Male	67	Ⅱ	8.7x8.5x7.2	T4		1	2	2	2	3	1	2	2	2	1	35
Male	61	Ⅱ	9.4x8.3x8.2	T4		1	2	2	2	3	1	2	2	2	1	26
Male	66	Ⅳ	3.5×3.1×2.6cm	T1a		1	2	3	1	1	1	2	2	2	1	51
Male	68	Ⅲ	9.8x9.3x9cm	T2		1	2	3	2	2	1	2	1	2	1	65
Male	66	Ⅳ	6.5×6.4×5.4cm	T3		1	2	3	1	3	1	2	1	2	1	47
Male	69	Ⅲ	10.4×9.3×8.3cm	T4	Y	1	2	3	2	3	2	2	1	2	1	25
Male	64	Ⅳ	10.6×10.2×9.8cm	T4	Y	1	2	3	2	3	2	2	1	2	1	23
Male	68	Ⅳ	8.7×7.3×5.5cm	T4	Y	1	2	3	2	3	2	2	1	2	1	27
Male	66	Ⅳ	9.5×8.4×7.3cm	T4	Y	1	2	3	2	3	2	2	1	2	1	20
Male	65	Ⅲ	8.5×7.4×5.5cm	T3	Y	1	2	3	2	3	2	2	1	2	1	35
Male	60	Ⅲ	9.5×8.7×7.4cm	T3	Y	1	2	3	2	3	2	2	1	2	1	29
Male	64	Ⅳ	9.1x8.3x6.7	T4	Y	1	2	3	2	3	2	2	2	2	1	26
Male	73	Ⅳ	10×9×5cm	T3		1	2	3	2	3	1	2	2	2	1	27
Male	61	Ⅳ	10×9×8cm	T3		1	2	3	2	3	1	2	2	2	1	37
Male	66	Ⅳ	11×9×8cm	T3		1	2	3	2	3	1	2	2	2	1	32
Male	64	Ⅲ	14×9.3×5cm	T3		1	2	3	2	3	1	2	2	2	1	33
Male	73	Ⅲ	8.7x8.6x6.8cm	T3		1	2	3	2	3	1	1	2	2	1	29
Female	63	Ⅲ	10.5×10×8.3cm	T4	Y	2	2	3	2	3	2	2	1	2	1	22
Female	56	Ⅱ	8.4×7.6×7.3cm	T2		2	1	2	2	2	1	1	2	2	1	68
Female	56	Ⅱ	9.3×8.2×7.4cm	T2		2	1	2	2	2	1	2	2	2	1	74
Female	51	Ⅲ	8.7x7.6x6.8cm	T2		2	1	3	2	2	1	1	2	2	1	55
Female	51	Ⅳ	10.5×9×9cm	T4	Y	2	1	3	2	3	2	2	2	2	1	29
Female	58	Ⅳ	11x9.9x8.5	T4	Y	2	1	3	2	3	2	1	2	1	2	26
Female	47	Ⅲ	17×9×9cm	T4	Y	2	1	3	2	3	2	1	2	2	1	24
Female	54	Ⅳ	8.8×7.3×6.5cm	T4	Y	2	1	3	2	3	2	2	1	2	1	25
Female	46	Ⅲ	8.2×7.5×4.5cm	T3		2	1	3	2	3	1	1	1	2	1	40
Female	60	Ⅰ	11.2×10.5×8cm	T4		2	2	1	2	3	1	1	1	2	1	46
Female	73	Ⅱ	6.5×4.7×4.5cm	T3		2	2	2	1	3	1	2	1	2	1	67
Female	73	Ⅱ	6.6x6.3x6.1cm	T3		2	2	2	1	3	1	2	1	2	1	54
Female	71	Ⅱ	7.6x7.4x6.7cm	T3		2	2	2	2	3	1	2	1	2	1	49
Female	69	Ⅳ	3.7×3.3×3.2cm	T1a		2	2	3	1	1	1	1	2	2	1	64
Female	66	Ⅳ	6.2×5.2×4.5cm	T3		2	2	3	1	3	1	2	2	2	1	34
Female	65	Ⅲ	6.5×6.4×4.3cm	T3		2	2	3	1	3	1	1	2	2	1	39
Female	74	Ⅳ	9.5×9.4×8.3cm	T4	Y	2	2	3	2	3	2	1	2	2	1	26
Female	76	Ⅳ	8.4×7.5×7.3cm	T4	Y	2	2	3	2	3	2	2	2	2	1	21
Female	60	Ⅲ	9.4x7.6x6.7	T4		2	2	3	2	3	1	1	1	2	1	45
